# Supplementary material for: Conserved patterns of integrated developmental plasticity in a group of polyphenic tropical butterflies
Source: PubMed Central journal article supplement (PMC5327525; doi:10.1186/s12862-017-0907-1), 2017-02-27
Supplement: 12862_2017_907_MOESM1_ESM.pdf [file 12862_2017_907_MOESM1_ESM.pdf]

Additional file 1: The repeatability for the wing pattern elements was estimated using 114 individuals, representing all species and both sexes.  $m_1$  and  $m_2$  represent the same individual being processed twice by our imaging and analysis platform.  $m_2$  and  $m_3$  represent the same image, being analysed twice. Imaging and analysis were conducted by four different researchers and yield high levels of repeatability ( $R^2$ ). Numbers refer to figure 1 in the main text.

| Trait (wing pattern element) | $m_1$ vs $m_2$         |           | $m_2$ vs $m_3$         |           |
|------------------------------|------------------------|-----------|------------------------|-----------|
|                              | Regression Coefficient | R-squared | Regression Coefficient | R-squared |
| VFW WhiteArea M1 (1w)        | 0.884                  | 0.894     | 0.968                  | 0.876     |
| VFW BlackArea M1 (1b)        | 1.002                  | 0.992     | 0.993                  | 0.990     |
| VFW YellowArea M1 (1y)       | 0.990                  | 0.990     | 0.990                  | 0.993     |
| VFW BlackArea Cu1 (2)        | 0.999                  | 0.992     | 0.996                  | 0.994     |
| VFW Band (3)                 | 0.964                  | 0.963     | 0.980                  | 0.966     |
| VHW Band (5)                 | 0.997                  | 0.990     | 0.995                  | 0.989     |
| DFW WhiteArea M1 (6w)        | 1.019                  | 0.983     | 0.996                  | 0.990     |
| DFW BlackArea M1 (6b)        | 1.015                  | 0.998     | 1.015                  | 0.998     |
| DFW YellowArea M1 (6y)       | 1.012                  | 0.998     | 0.997                  | 0.998     |
| DFW WhiteArea Cu1 (7w)       | 0.973                  | 0.953     | 0.988                  | 0.948     |
| DFW BlackArea Cu1 (7b)       | 0.989                  | 0.986     | 1.008                  | 0.988     |
| DFW YellowArea Cu1 (7y)      | 0.989                  | 0.991     | 1.003                  | 0.995     |
| VFW HeronsFormula (8)        | 0.998                  | 0.984     | 0.993                  | 0.994     |
| VFW Xto2nd                   | 0.986                  | 0.976     | 0.990                  | 0.983     |
| VFW 2to7th                   | 1.021                  | 0.975     | 0.997                  | 0.996     |
| VFW Xto7th                   | 0.981                  | 0.973     | 0.998                  | 0.985     |
| VHW HeronsFormula (9)        | 0.985                  | 0.987     | 0.986                  | 0.993     |
| VHW Xto2nd                   | 0.986                  | 0.976     | 0.990                  | 0.983     |
| VHW 2to7th                   | 1.006                  | 0.985     | 1.004                  | 0.993     |
| VHW Xto7th                   | 0.977                  | 0.975     | 0.977                  | 0.979     |
| Overall (mean)               | 0.989                  | 0.978     | 0.993                  | 0.981     |
