# Supplementary material for: Conserved patterns of integrated developmental plasticity in a group of polyphenic tropical butterflies
Source: PubMed Central journal article supplement (PMC5327525; doi:10.1186/s12862-017-0907-1), 2017-02-27
Supplement: 12862_2017_907_MOESM2_ESM.pdf [file 12862_2017_907_MOESM2_ESM.pdf]

Additional file 2: Principal component analyses of reaction norm data. Table gives the first two principal components (PC1 and PC2) of nine wing pattern measurements and the percentage of variation explained by each principal component. PC1 explained over 55% of the variation in the data in all species and was associated with seasonality.

| Trait                  | Element | <i>B. anynana</i> |        | <i>B. safitza</i> |        | <i>M. mineus</i> |        | <i>M. perseoides</i> |        | <i>H. iboina</i> |        |
|------------------------|---------|-------------------|--------|-------------------|--------|------------------|--------|----------------------|--------|------------------|--------|
|                        |         | PC1               | PC2    | PC1               | PC2    | PC1              | PC2    | PC1                  | PC2    | PC1              | PC2    |
| VFW WhiteArea M1       | (1w)    | -0.247            | 0.130  | 0.320             | 0.004  | -0.236           | -0.205 | 0.107                | -0.311 | -0.343           | 0.085  |
| VFW BlackArea M1       | (1b)    | -0.317            | 0.503  | 0.383             | 0.161  | -0.410           | -0.024 | 0.412                | -0.016 | -0.389           | 0.106  |
| VFW YellowArea M1      | (1y)    | -0.374            | 0.342  | 0.393             | 0.090  | -0.417           | 0.025  | 0.413                | 0.015  | -0.389           | 0.076  |
| VFW BlackArea Cu1      | (2b)    | -0.243            | -0.085 | 0.122             | 0.636  | -0.409           | -0.039 | 0.403                | -0.028 | -0.339           | -0.089 |
| VFW Band               | (3)     | -0.299            | -0.548 | 0.265             | -0.525 | -0.179           | 0.625  | -0.027               | 0.682  | -0.050           | -0.754 |
| VHW WhiteArea Cu1      | (4w)    | -0.371            | -0.124 | 0.357             | 0.001  | -0.222           | -0.421 | 0.380                | -0.085 | -0.357           | -0.009 |
| VHW BlackArea Cu1      | (4b)    | -0.390            | 0.127  | 0.386             | 0.168  | -0.396           | -0.119 | 0.407                | 0.027  | -0.393           | 0.093  |
| VHW YellowArea Cu1     | (4y)    | -0.411            | 0.049  | 0.394             | 0.098  | -0.406           | -0.044 | 0.409                | 0.064  | -0.397           | 0.075  |
| VHW Band               | (5)     | -0.303            | -0.522 | 0.283             | -0.498 | -0.181           | 0.609  | 0.089                | 0.652  | -0.153           | -0.621 |
| Proportion of Variance |         | 0.548             | 0.144  | 0.665             | 0.152  | 0.600            | 0.190  | 0.623                | 0.205  | 0.631            | 0.153  |
| Cumulative Proportion  |         | 0.548             | 0.692  | 0.665             | 0.817  | 0.600            | 0.790  | 0.623                | 0.827  | 0.631            | 0.784  |
