# Supplementary material for: Conserved patterns of integrated developmental plasticity in a group of polyphenic tropical butterflies
Source: PubMed Central journal article supplement (PMC5327525; doi:10.1186/s12862-017-0907-1), 2017-02-27
Supplement: 12862_2017_907_MOESM3_ESM.pdf [file 12862_2017_907_MOESM3_ESM.pdf]

### 3E: Pupal mass

Effects of developmental temperature on pupal mass (mg) in *ANY*, *SAF*, *MIN*, *PER* and *IBO*. The mean value is plotted as a function of temperature and error bars represent 95% confidence intervals. Females and males are represented by the solid and dotted lines, respectively.

Minimum adequate models of the effect of developmental temperature and sex on the same trait. Statistical significance is indicated as: \* P < 0.05, \*\* P < 0.01, \*\*\* P < 0.001.

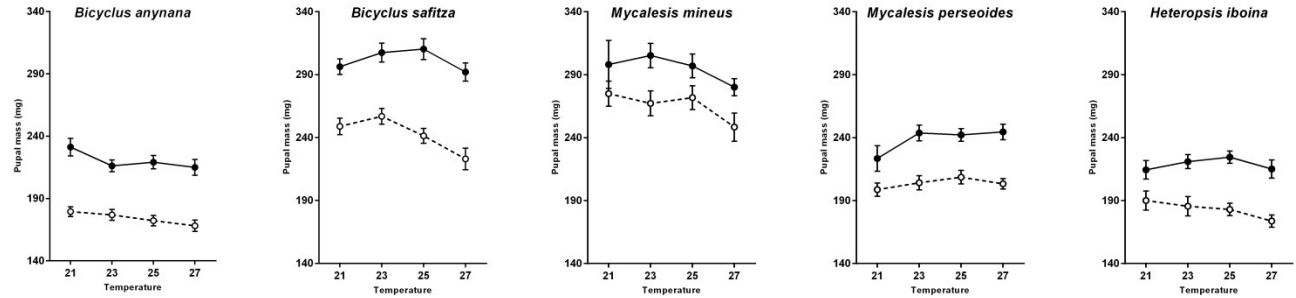

| Trait           | (transformation) | Fixed effects     | F     | df | df  | P   | F     | df | df  | P   | F    | df | df  | P   | F     | df | df  | P   |       |   |     |     |
|-----------------|------------------|-------------------|-------|----|-----|-----|-------|----|-----|-----|------|----|-----|-----|-------|----|-----|-----|-------|---|-----|-----|
| Pupal mass (mg) |                  | Temperature       | 10.0  | 3  | 272 | *** | 11.6  | 3  | 350 | *** | 9.3  | 3  | 202 | *** | 12.3  | 3  | 349 | *** | 9.1   | 3 | 393 | *** |
|                 |                  | Sex               | 653.8 | 1  | 272 | *** | 536.3 | 1  | 350 | *** | 72.8 | 1  | 202 | *** | 293.7 | 1  | 349 | *** | 271.0 | 1 | 393 | *** |
|                 |                  | Temperature x Sex |       |    |     |     | 5.4   | 3  | 350 | **  |      |    |     |     | 3.0   | 3  | 349 | *   |       |   |     |     |

### 3F: Total wing area

Effects of developmental temperature on total wing area (mm<sup>2</sup>) in *ANY*, *SAF*, *MIN*, *PER* and *IBO*. The mean value is plotted as a function of temperature and error bars represent 95% confidence intervals. Females and males are represented by the solid and dotted lines, respectively.

Minimum adequate models of the effect of developmental temperature and sex on the same trait. Statistical significance is indicated as: \* P < 0.05, \*\* P < 0.01, \*\*\* P < 0.001.

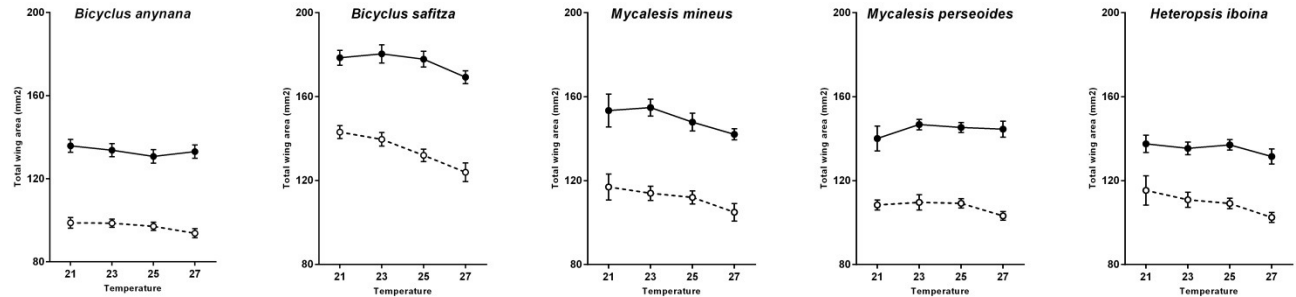

| Trait                              | (transformation) | Fixed effects     | F      | df | df  | P   | F      | df | df  | P   | F     | df | df  | P   | F      | df | df  | P   |       |   |     |     |
|------------------------------------|------------------|-------------------|--------|----|-----|-----|--------|----|-----|-----|-------|----|-----|-----|--------|----|-----|-----|-------|---|-----|-----|
| Total wing area (mm <sup>2</sup> ) |                  | Temperature       | 3.5    | 3  | 272 | *   | 22.7   | 3  | 350 | *** | 9.2   | 3  | 200 | *** | 12.5   | 3  | 353 | *** | 21.1  | 3 | 393 | *** |
|                                    |                  | Sex               | 1431.8 | 1  | 272 | *** | 1041.6 | 1  | 350 | *** | 707.2 | 1  | 200 | *** | 1155.7 | 1  | 353 | *** | 482.0 | 1 | 393 | *** |
|                                    |                  | Temperature x Sex |        |    |     |     | 3.7    | 3  | 350 | *   |       |    |     |     | 3.2    | 3  | 353 | *   |       |   |     |     |



### 3I: Abdomen ratio

Effects of developmental temperature on the abdomen ratio (%) in *ANY*, *SAF*, *MIN*, *PER* and *IBO*. The mean value is plotted as a function of temperature and error bars represent 95% confidence intervals. Females and males are represented by the solid and dotted lines, respectively.

Minimum adequate models of the effect of developmental temperature and sex on the same trait. Statistical significance is indicated as: \* P < 0.05, \*\* P < 0.01, \*\*\* P < 0.001.

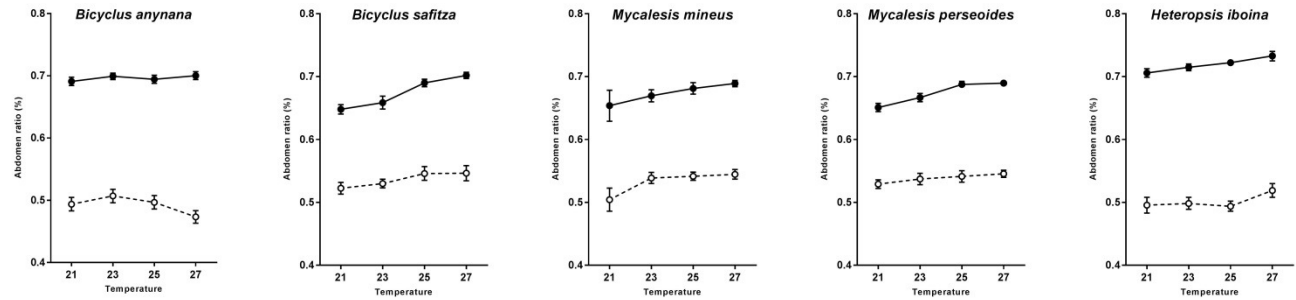

| Trait             | (transformation) | Fixed effects     | F      | df | df  | P   | F      | df | df  | P   | F      | df | df  | P   | F      | df | df  | P   |        |   |     |     |
|-------------------|------------------|-------------------|--------|----|-----|-----|--------|----|-----|-----|--------|----|-----|-----|--------|----|-----|-----|--------|---|-----|-----|
| Abdomen ratio (%) |                  | Temperature       | 7.3    | 3  | 265 | *** | 41.9   | 3  | 347 | *** | 20.9   | 3  | 200 | *** | 40.1   | 3  | 350 | *** | 7.1    | 3 | 374 | *** |
|                   |                  | Sex               | 4198.2 | 1  | 265 | *** | 1915.8 | 1  | 347 | *** | 1537.8 | 1  | 200 | *** | 3286.6 | 1  | 350 | *** | 6288.4 | 1 | 374 | *** |
|                   |                  | Temperature x Sex | 6.1    | 3  | 265 | *** | 5.9    | 3  | 347 | **  |        |    |     |     | 6.5    | 3  | 350 | *** |        |   |     |     |
