# Supplementary material for: Conserved patterns of integrated developmental plasticity in a group of polyphenic tropical butterflies
Source: PubMed Central journal article supplement (PMC5327525; doi:10.1186/s12862-017-0907-1), 2017-02-27
Supplement: 12862_2017_907_MOESM4_ESM.pdf [file 12862_2017_907_MOESM4_ESM.pdf]

Additional file 4: Reaction norm graphs and minimum adequate models for all wing pattern elements.

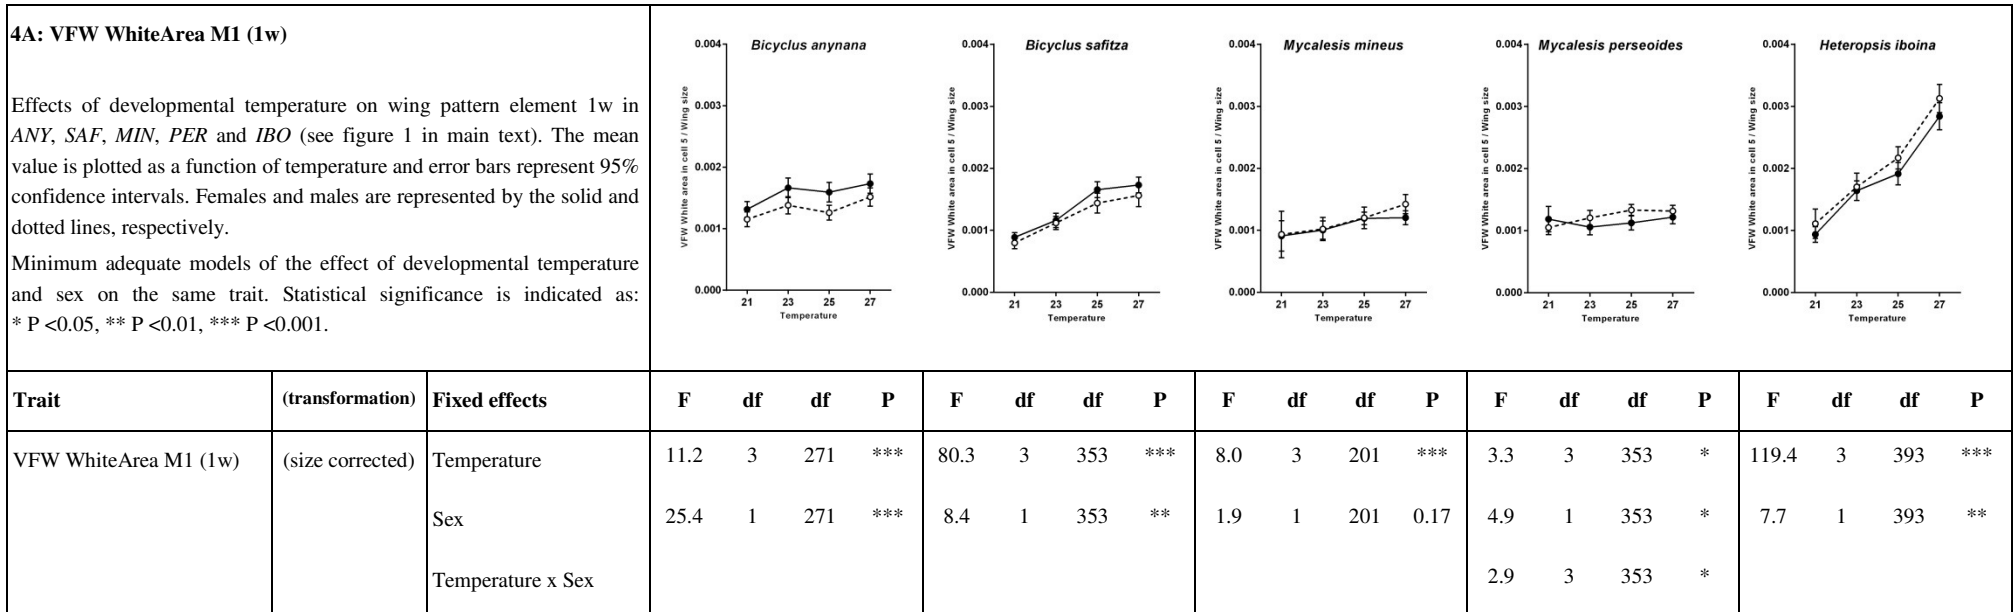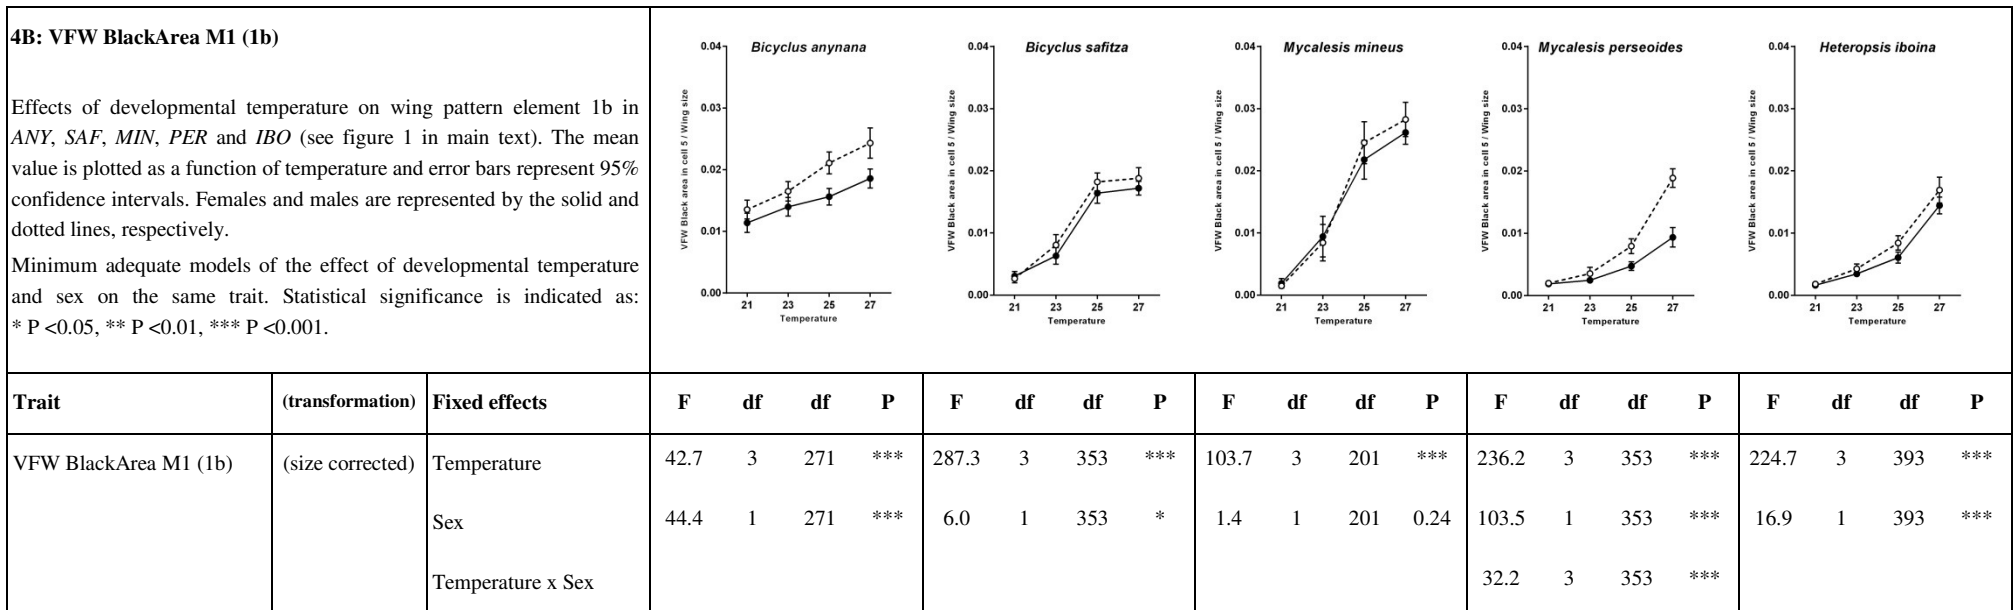

#### 4C: VFW YellowArea M1 (1y)

Effects of developmental temperature on wing pattern element 1y in *ANY*, *SAF*, *MIN*, *PER* and *IBO* (see figure 1 in main text). The mean value is plotted as a function of temperature and error bars represent 95% confidence intervals. Females and males are represented by the solid and dotted lines, respectively.

Minimum adequate models of the effect of developmental temperature and sex on the same trait. Statistical significance is indicated as: \* P < 0.05, \*\* P < 0.01, \*\*\* P < 0.001.

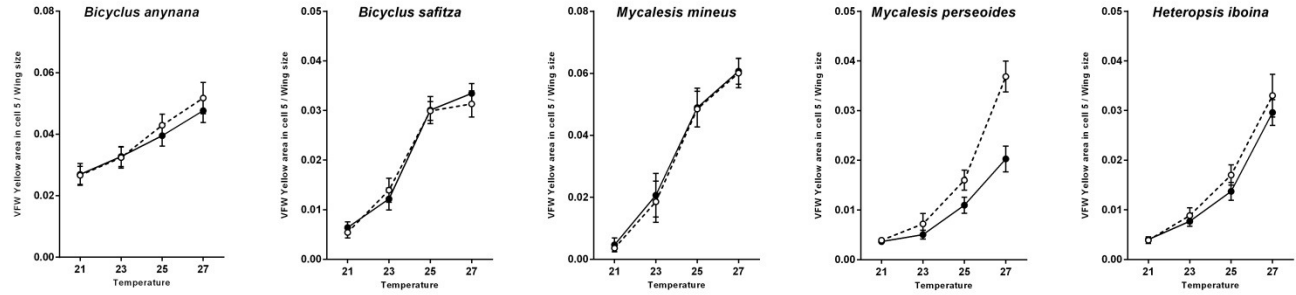

| Trait                  | (transformation) | Fixed effects     | F    | df | df  | P    | F     | df | df  | P    | F     | df | df  | P    | F     | df | df  | P   |       |   |     |     |
|------------------------|------------------|-------------------|------|----|-----|------|-------|----|-----|------|-------|----|-----|------|-------|----|-----|-----|-------|---|-----|-----|
| VFW YellowArea M1 (1y) | (size corrected) | Temperature       | 60.7 | 3  | 271 | ***  | 344.2 | 3  | 353 | ***  | 125.9 | 3  | 201 | ***  | 256.4 | 3  | 353 | *** | 213.8 | 3 | 393 | *** |
|                        |                  | Sex               | 1.8  | 1  | 271 | 0.19 | 0.2   | 1  | 353 | 0.64 | 0.2   | 1  | 201 | 0.63 | 82.5  | 1  | 353 | *** | 7.9   | 1 | 393 | **  |
|                        |                  | Temperature x Sex |      |    |     |      |       |    |     |      |       |    |     |      | 25.8  | 3  | 353 | *** |       |   |     |     |

#### 4D: VFW BlackArea Cu1 (2b)

Effects of developmental temperature on wing pattern element 2b in *ANY*, *SAF*, *MIN*, *PER* and *IBO* (see figure 1 in main text). The mean value is plotted as a function of temperature and error bars represent 95% confidence intervals. Females and males are represented by the solid and dotted lines, respectively.

Minimum adequate models of the effect of developmental temperature and sex on the same trait. Statistical significance is indicated as: \* P < 0.05, \*\* P < 0.01, \*\*\* P < 0.001.

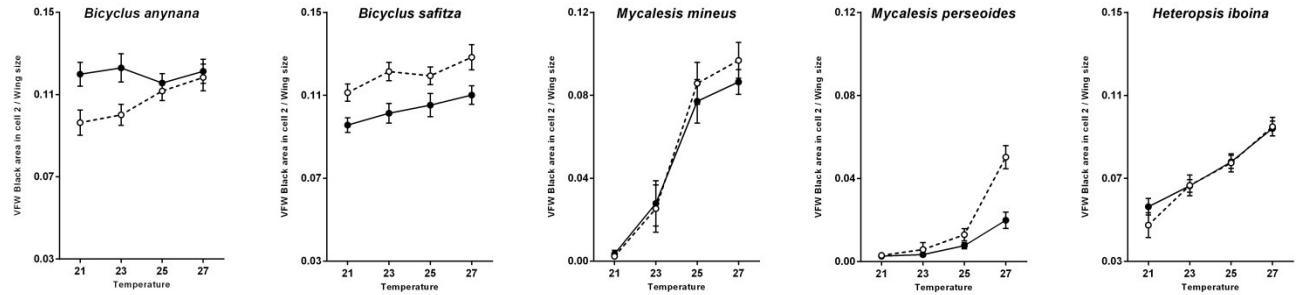

| Trait                  | (transformation) | Fixed effects     | F    | df | df  | P   | F     | df | df  | P   | F     | df | df  | P    | F     | df   | df  | P   |       |   |     |      |
|------------------------|------------------|-------------------|------|----|-----|-----|-------|----|-----|-----|-------|----|-----|------|-------|------|-----|-----|-------|---|-----|------|
| VFW BlackArea Cu1 (2b) | (size corrected) | Temperature       | 6.0  | 3  | 268 | *** | 16.4  | 3  | 353 | *** | 121.3 | 3  | 201 | ***  | 191.1 | 3    | 353 | *** | 125.5 | 3 | 393 | ***  |
|                        |                  | Sex               | 44.1 | 1  | 268 | *** | 112.1 | 1  | 353 | *** | 2.3   | 1  | 201 | 0.13 | 85.0  | 1    | 353 | *** | 0.6   | 1 | 393 | 0.43 |
|                        |                  | Temperature x Sex | 8.1  | 3  | 268 | *** |       |    |     |     |       |    |     |      |       | 38.4 | 3   | 353 | ***   |   |     |      |

#### 4E: VFW Band (3)

Effects of developmental temperature on wing pattern element 3 in *ANY*, *SAF*, *MIN*, *PER* and *IBO* (see figure 1 in main text). The mean value is plotted as a function of temperature and error bars represent 95% confidence intervals. Females and males are represented by the solid and dotted lines, respectively.

Minimum adequate models of the effect of developmental temperature and sex on the same trait. Statistical significance is indicated as: \* P < 0.05, \*\* P < 0.01, \*\*\* P < 0.001.

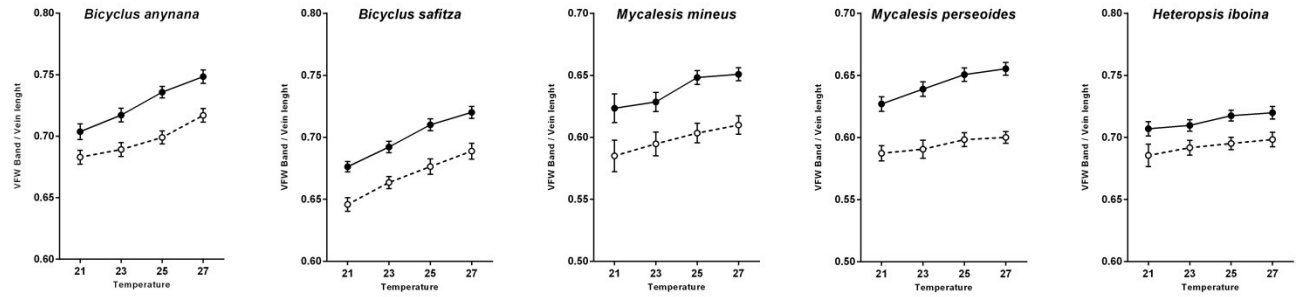

| Trait        | (transformation) | Fixed effects     | F     | df | df  | P   | F     | df | df  | P   | F     | df | df  | P   | F     | df | df  | P   |       |   |     |     |
|--------------|------------------|-------------------|-------|----|-----|-----|-------|----|-----|-----|-------|----|-----|-----|-------|----|-----|-----|-------|---|-----|-----|
| VFW Band (3) | (size corrected) | Temperature       | 77.6  | 3  | 269 | *** | 112.9 | 3  | 353 | *** | 21.5  | 3  | 198 | *** | 23.1  | 3  | 356 | *** | 4.4   | 3 | 393 | **  |
|              |                  | Sex               | 228.8 | 1  | 269 | *** | 292.1 | 1  | 353 | *** | 225.7 | 1  | 198 | *** | 599.1 | 1  | 356 | *** | 113.9 | 1 | 393 | *** |
|              |                  | Temperature x Sex | 3.0   | 3  | 269 | *   |       |    |     |     |       |    |     |     |       |    |     |     |       |   |     |     |

#### 4F: VHW WhiteArea Cu1 (4w)

Effects of developmental temperature on wing pattern element 4w in *ANY*, *SAF*, *MIN*, *PER* and *IBO* (see figure 1 in main text). The mean value is plotted as a function of temperature and error bars represent 95% confidence intervals. Females and males are represented by the solid and dotted lines, respectively.

Minimum adequate models of the effect of developmental temperature and sex on the same trait. Statistical significance is indicated as: \* P < 0.05, \*\* P < 0.01, \*\*\* P < 0.001.

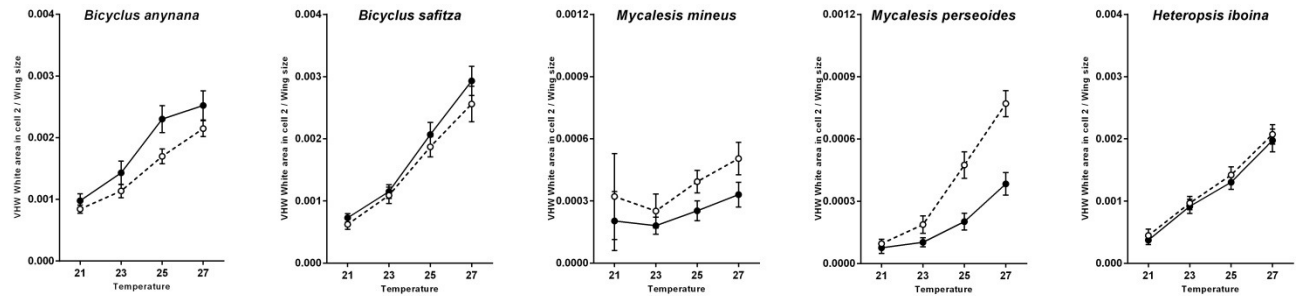

| Trait                  | (transformation) | Fixed effects     | F     | df | df  | P   | F     | df | df  | P   | F    | df | df  | P   | F     | df | df  | P   |       |   |     |      |
|------------------------|------------------|-------------------|-------|----|-----|-----|-------|----|-----|-----|------|----|-----|-----|-------|----|-----|-----|-------|---|-----|------|
| VHW WhiteArea Cu1 (4w) | (size corrected) | Temperature       | 139.4 | 3  | 269 | *** | 273.6 | 3  | 353 | *** | 11.6 | 3  | 201 | *** | 187.5 | 3  | 353 | *** | 177.1 | 3 | 393 | ***  |
|                        |                  | Sex               | 40.9  | 1  | 269 | *** | 9.4   | 1  | 353 | **  | 27.4 | 1  | 201 | *** | 153.4 | 1  | 353 | *** | 3.3   | 1 | 393 | 0.07 |
|                        |                  | Temperature x Sex | 3.2   | 3  | 269 | *   |       |    |     |     |      |    |     |     | 24.7  | 3  | 353 | *** |       |   |     |      |

#### 4G: VHW BlackArea Cu1 (4b)

Effects of developmental temperature on wing pattern element 4b in *ANY*, *SAF*, *MIN*, *PER* and *IBO* (see figure 1 in main text). The mean value is plotted as a function of temperature and error bars represent 95% confidence intervals. Females and males are represented by the solid and dotted lines, respectively.

Minimum adequate models of the effect of developmental temperature and sex on the same trait. Statistical significance is indicated as: \* P < 0.05, \*\* P < 0.01, \*\*\* P < 0.001.

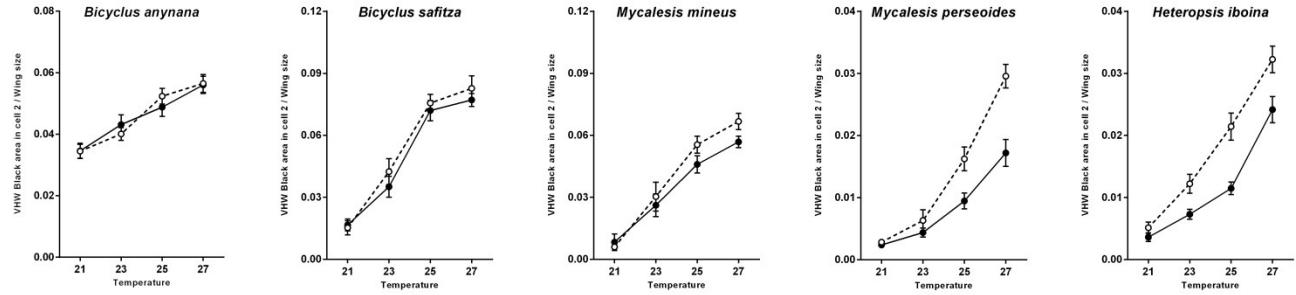

| Trait                  | (transformation) | Fixed effects     | F     | df | df  | P    | F     | df | df  | P   | F     | df | df  | P   | F     | df   | df  | P   |       |     |     |     |
|------------------------|------------------|-------------------|-------|----|-----|------|-------|----|-----|-----|-------|----|-----|-----|-------|------|-----|-----|-------|-----|-----|-----|
| VHW BlackArea Cu1 (4b) | (size corrected) | Temperature       | 103.9 | 3  | 272 | ***  | 372.1 | 3  | 353 | *** | 158.5 | 3  | 201 | *** | 300.8 | 3    | 353 | *** | 322.4 | 3   | 390 | *** |
|                        |                  | Sex               | 0.1   | 1  | 272 | 0.82 | 5.0   | 1  | 353 | *   | 17.9  | 1  | 201 | *** | 114.0 | 1    | 353 | *** | 152.1 | 1   | 390 | *** |
|                        |                  | Temperature x Sex |       |    |     |      |       |    |     |     |       |    |     |     |       | 23.7 | 3   | 353 | ***   | 9.3 | 3   | 390 |

#### 4H: VHW YellowArea Cu1 (4y)

Effects of developmental temperature on wing pattern element 4y in *ANY*, *SAF*, *MIN*, *PER* and *IBO* (see figure 1 in main text). The mean value is plotted as a function of temperature and error bars represent 95% confidence intervals. Females and males are represented by the solid and dotted lines, respectively.

Minimum adequate models of the effect of developmental temperature and sex on the same trait. Statistical significance is indicated as: \* P < 0.05, \*\* P < 0.01, \*\*\* P < 0.001.

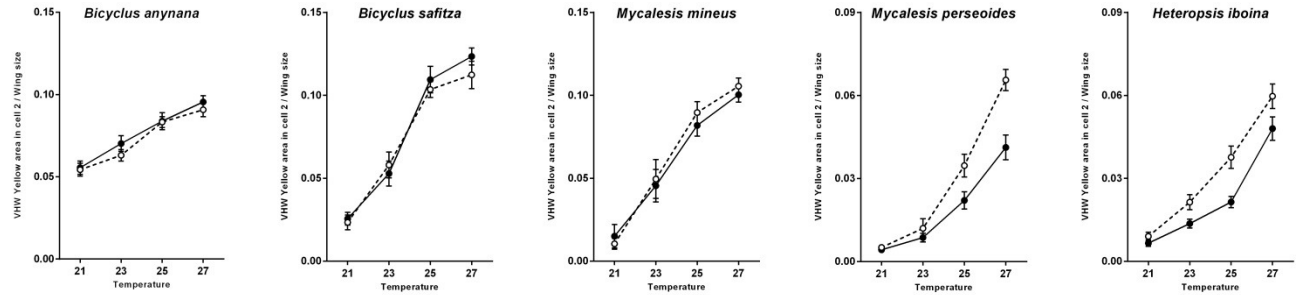

| Trait                   | (transformation) | Fixed effects     | F     | df | df  | P   | F     | df | df  | P    | F     | df | df  | P    | F     | df   | df  | P   |       |     |     |     |
|-------------------------|------------------|-------------------|-------|----|-----|-----|-------|----|-----|------|-------|----|-----|------|-------|------|-----|-----|-------|-----|-----|-----|
| VHW YellowArea Cu1 (4y) | (size corrected) | Temperature       | 139.3 | 3  | 272 | *** | 413.1 | 3  | 353 | ***  | 172.5 | 3  | 201 | ***  | 373.8 | 3    | 353 | *** | 319.5 | 3   | 390 | *** |
|                         |                  | Sex               | 5.6   | 1  | 272 | *   | 2.0   | 1  | 353 | 0.16 | 3.0   | 1  | 201 | 0.08 | 93.8  | 1    | 353 | *** | 97.8  | 1   | 390 | *** |
|                         |                  | Temperature x Sex |       |    |     |     |       |    |     |      |       |    |     |      |       | 20.9 | 3   | 353 | ***   | 6.3 | 3   | 390 |

**4I: VHW Band (5)**

Effects of developmental temperature on wing pattern element 5 in *ANY*, *SAF*, *MIN*, *PER* and *IBO* (see figure 1 in main text). The mean value is plotted as a function of temperature and error bars represent 95% confidence intervals. Females and males are represented by the solid and dotted lines, respectively.

Minimum adequate models of the effect of developmental temperature and sex on the same trait. Statistical significance is indicated as: \* P < 0.05, \*\* P < 0.01, \*\*\* P < 0.001.

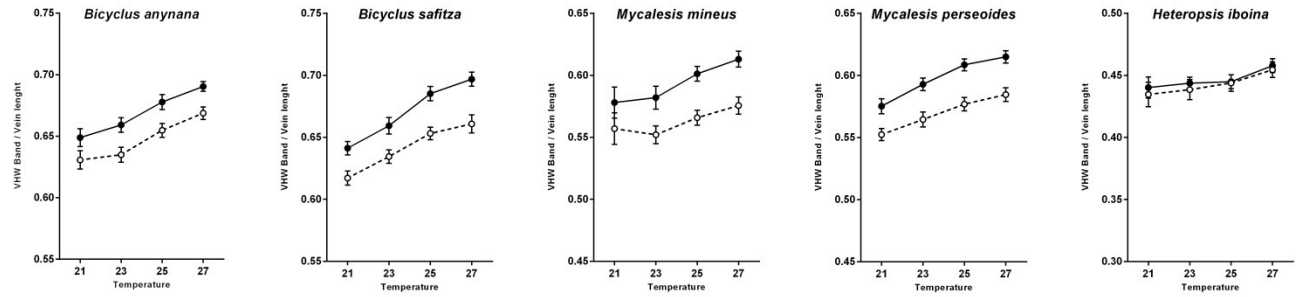

| Trait        | (transformation) | Fixed effects     | F     | df | df  | P   | F     | df | df  | P   | F     | df | df  | P   | F     | df | df  | P    |
|--------------|------------------|-------------------|-------|----|-----|-----|-------|----|-----|-----|-------|----|-----|-----|-------|----|-----|------|
| VHW Band (5) | (size corrected) | Temperature       | 74.8  | 3  | 272 | *** | 119.9 | 3  | 353 | *** | 29.1  | 3  | 198 | *** | 69.0  | 3  | 356 | ***  |
|              |                  | Sex               | 108.1 | 1  | 272 | *** | 188.8 | 1  | 353 | *** | 154.7 | 1  | 198 | *** | 229.2 | 1  | 356 | ***  |
|              |                  | Temperature x Sex |       |    |     |     |       |    |     |     |       |    |     |     |       |    |     | 0.15 |

**4J: DFW WhiteArea M1 (6w)**

Effects of developmental temperature on wing pattern element 6w in *ANY*, *SAF*, *MIN*, *PER* and *IBO* (see figure 1 in main text). The mean value is plotted as a function of temperature and error bars represent 95% confidence intervals. Females and males are represented by the solid and dotted lines, respectively.

Minimum adequate models of the effect of developmental temperature and sex on the same trait. Statistical significance is indicated as: \* P < 0.05, \*\* P < 0.01, \*\*\* P < 0.001.

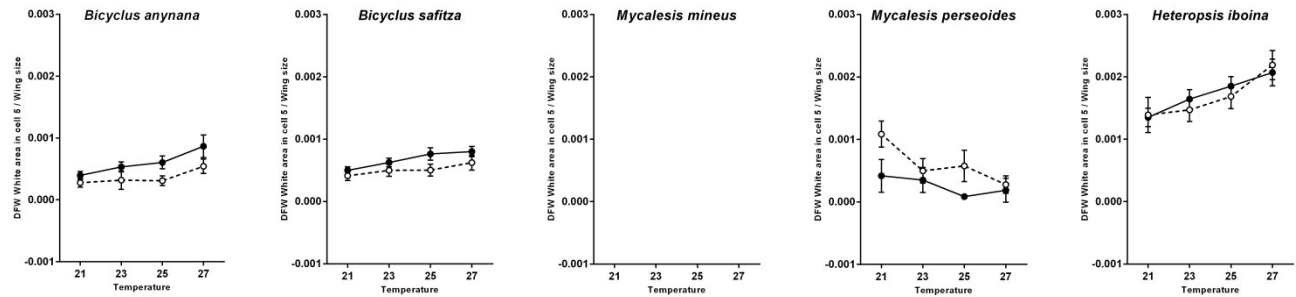

| Trait                 | (transformation) | Fixed effects     | F    | df | df  | P   | F    | df | df  | P   | F  | df | df | P  | F    | df | df  | P   |
|-----------------------|------------------|-------------------|------|----|-----|-----|------|----|-----|-----|----|----|----|----|------|----|-----|-----|
| DFW WhiteArea M1 (6w) | (size corrected) | Temperature       | 17.3 | 3  | 242 | *** | 14.6 | 3  | 345 | *** | na | na | na | na | 12.0 | 3  | 218 | *** |
|                       |                  | Sex               | 35.4 | 1  | 242 | *** | 27.8 | 1  | 345 | *** | na | na | na | na | 24.6 | 1  | 218 | *** |
|                       |                  | Temperature x Sex |      |    |     |     |      |    |     |     | na | na | na | na | 3.7  | 3  | 218 | *   |

#### 4K: DFW BlackArea M1 (6b)

Effects of developmental temperature on wing pattern element 6b in *ANY*, *SAF*, *MIN*, *PER* and *IBO* (see figure 1 in main text). The mean value is plotted as a function of temperature and error bars represent 95% confidence intervals. Females and males are represented by the solid and dotted lines, respectively.

Minimum adequate models of the effect of developmental temperature and sex on the same trait. Statistical significance is indicated as: \* P < 0.05, \*\* P < 0.01, \*\*\* P < 0.001.

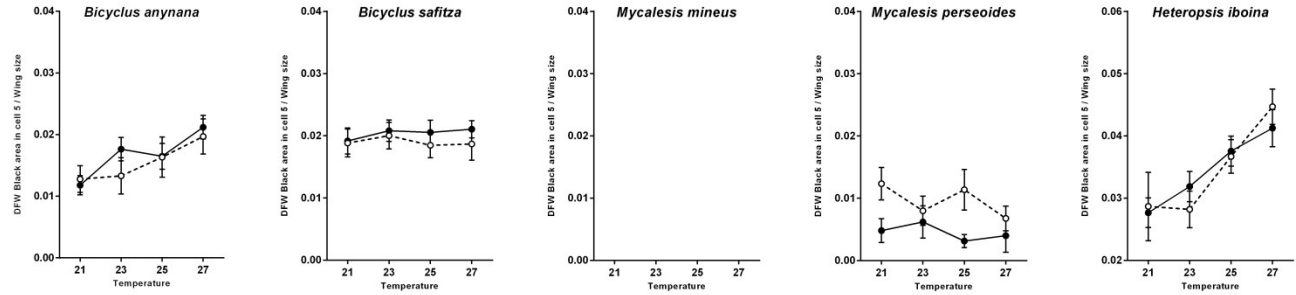

| Trait                 | (transformation) | Fixed effects     | F    | df | df  | P    | F   | df | df  | P    | F  | df | df | P  | F    | df | df  | P   |      |   |     |      |
|-----------------------|------------------|-------------------|------|----|-----|------|-----|----|-----|------|----|----|----|----|------|----|-----|-----|------|---|-----|------|
| DFW BlackArea M1 (6b) | (size corrected) | Temperature       | 19.1 | 3  | 242 | ***  | 0.8 | 3  | 345 | 0.47 | na | na | na | na | 3.0  | 3  | 218 | *   | 40.1 | 3 | 391 | ***  |
|                       |                  | Sex               | 2.1  | 1  | 242 | 0.15 | 3.3 | 1  | 345 | 0.07 | na | na | na | na | 34.1 | 1  | 218 | *** | 0.1  | 1 | 391 | 0.75 |
|                       |                  | Temperature x Sex |      |    |     |      |     |    |     |      | na | na | na | na | 3.5  | 3  | 218 | *   |      |   |     |      |

#### 4L: DFW YellowArea M1 (6y)

Effects of developmental temperature on wing pattern element 6y in *ANY*, *SAF*, *MIN*, *PER* and *IBO* (see figure 1 in main text). The mean value is plotted as a function of temperature and error bars represent 95% confidence intervals. Females and males are represented by the solid and dotted lines, respectively.

Minimum adequate models of the effect of developmental temperature and sex on the same trait. Statistical significance is indicated as: \* P < 0.05, \*\* P < 0.01, \*\*\* P < 0.001.

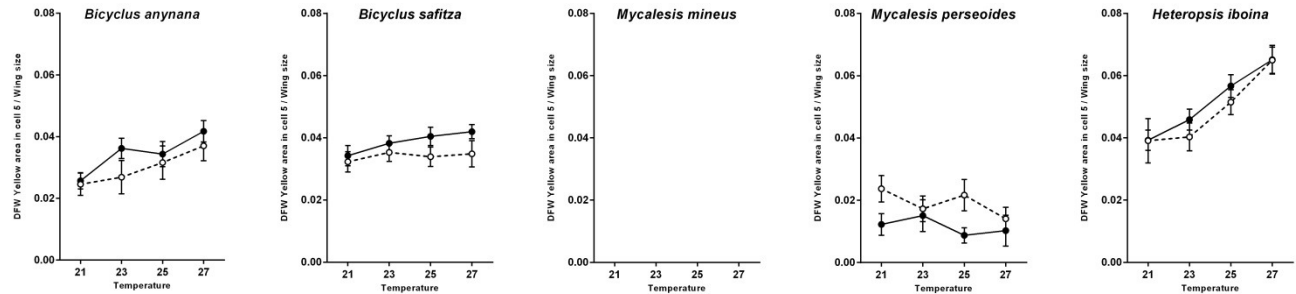

| Trait                  | (transformation) | Fixed effects     | F    | df | df  | P   | F    | df | df  | P   | F  | df | df | P  | F    | df | df  | P   |      |   |     |     |
|------------------------|------------------|-------------------|------|----|-----|-----|------|----|-----|-----|----|----|----|----|------|----|-----|-----|------|---|-----|-----|
| DFW YellowArea M1 (6y) | (size corrected) | Temperature       | 19.2 | 3  | 242 | *** | 5.0  | 3  | 345 | **  | na | na | na | na | 3.1  | 3  | 218 | *   | 54.5 | 3 | 391 | *** |
|                        |                  | Sex               | 9.7  | 1  | 242 | **  | 16.5 | 1  | 345 | *** | na | na | na | na | 25.3 | 1  | 218 | *** | 4.9  | 1 | 391 | *   |
|                        |                  | Temperature x Sex |      |    |     |     |      |    |     |     | na | na | na | na | 3.1  | 3  | 218 | *   |      |   |     |     |



#### 4O: DFW YellowArea Cu1 (7y)

Effects of developmental temperature on wing pattern element 7y in *ANY*, *SAF*, *MIN*, *PER* and *IBO* (see figure 1 in main text). The mean value is plotted as a function of temperature and error bars represent 95% confidence intervals. Females and males are represented by the solid and dotted lines, respectively.

Minimum adequate models of the effect of developmental temperature and sex on the same trait. Statistical significance is indicated as: \* P < 0.05, \*\* P < 0.01, \*\*\* P < 0.001.

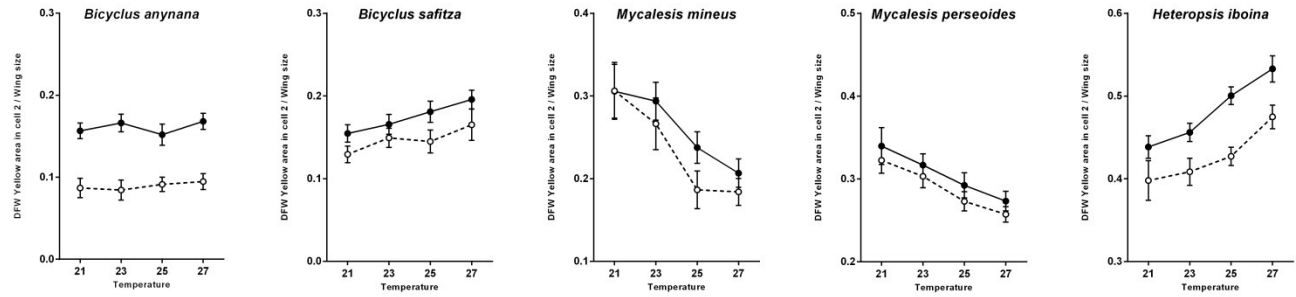

| Trait                   | (transformation) | Fixed effects     | F     | df | df  | P    | F    | df | df  | P   | F    | df | df  | P   | F    | df | df  | P   |       |   |     |     |
|-------------------------|------------------|-------------------|-------|----|-----|------|------|----|-----|-----|------|----|-----|-----|------|----|-----|-----|-------|---|-----|-----|
| DFW YellowArea Cu1 (7y) | (size corrected) | Temperature       | 2.0   | 3  | 242 | 0.11 | 14.0 | 3  | 345 | *** | 34.5 | 3  | 201 | *** | 34.3 | 3  | 356 | *** | 46.8  | 3 | 393 | *** |
|                         |                  | Sex               | 345.3 | 1  | 242 | ***  | 36.8 | 1  | 345 | *** | 14.3 | 1  | 201 | *** | 11.6 | 1  | 356 | *** | 134.8 | 1 | 393 | *** |
|                         |                  | Temperature x Sex |       |    |     |      |      |    |     |     |      |    |     |     |      |    |     |     |       |   |     |     |

#### 4P: PC1 ventral wing elements

Effects of developmental temperature on PC1 (ventral wing pattern elements) in *ANY*, *SAF*, *MIN*, *PER* and *IBO* (see figure 1 in main text). The mean value is plotted as a function of temperature and error bars represent 95% confidence intervals. Females and males are represented by the solid and dotted lines, respectively.

Minimum adequate models of the effect of developmental temperature and sex on the same trait. Statistical significance is indicated as: \* P < 0.05, \*\* P < 0.01, \*\*\* P < 0.001.

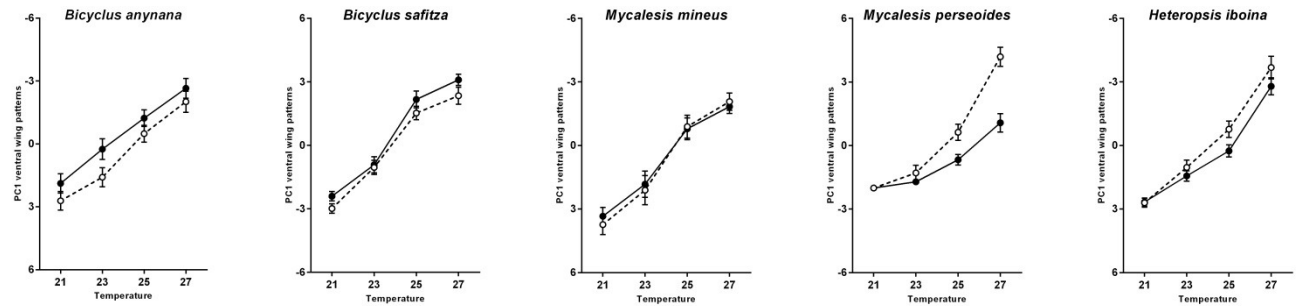

| Trait                     | (transformation) | Fixed effects     | F      | df | df  | P   | F     | df | df  | P   | F     | df | df  | P    | F     | df   | df  | P   |       |     |     |     |
|---------------------------|------------------|-------------------|--------|----|-----|-----|-------|----|-----|-----|-------|----|-----|------|-------|------|-----|-----|-------|-----|-----|-----|
| PC1 ventral wing elements | (size corrected) | Temperature       | 166.42 | 3  | 271 | *** | 521.2 | 3  | 353 | *** | 149.4 | 3  | 200 | ***  | 339.4 | 3    | 353 | *** | 364.1 | 3   | 390 | *** |
|                           |                  | Sex               | 32.35  | 1  | 271 | *** | 21.2  | 1  | 353 | *** | 0.0   | 1  | 200 | 0.95 | 128.7 | 1    | 353 | *** | 27.4  | 1   | 390 | *** |
|                           |                  | Temperature x Sex |        |    |     |     |       |    |     |     |       |    |     |      |       | 34.9 | 3   | 353 | ***   | 3.0 | 3   | 390 |
